# Supplementary material for: Analyses of the electronic structures of FeFe-cofactors compared with those of FeMo- and FeV-cofactors and their P-clusters
Source: Royal Society of Chemistry journal article supplement (doi:10.1039/d3dt04126c), 2024-01-01
Supplement: d3dt04126c1.pdf [file d3dt04126c1.pdf]

## Supporting information

### Analyses of the electronic structures of FeFe-cofactors compared with FeMo- and FeV-cofactors and their P-clusters†

Zhen-Lang Xie,<sup>a</sup> Wan-Ting Jin,<sup>b</sup> Zhao-Hui Zhou,<sup>a\*</sup>

<sup>a</sup> State Key Laboratory for Physical Chemistry of Solid Surfaces, College of Chemistry and Chemical Engineering, Xiamen University, Xiamen, 361005, China, zhzhou@xmu.edu.cn

<sup>b</sup> College of Chemical and Material Engineering, Quzhou University, Quzhou, 324000, China

#### Table Options

|                  |                                                                                                                            |    |
|------------------|----------------------------------------------------------------------------------------------------------------------------|----|
| <b>Table S1</b>  | Bond valence analyses (abbreviated as Bval) for irons in FeFe-cofactor [1] in resting state (PDB entry: <i>8BOQ</i> )..... | 2  |
| <b>Table S2</b>  | Bond valence analyses for irons in FeFe-cofactor [2] in resting state (PDB entry: <i>8BOQ</i> ).....                       | 4  |
| <b>Table S3</b>  | Bond valence analyses for irons in FeFe-cofactor [1] in turnover state (PDB entry: <i>8BOQ</i> ).....                      | 6  |
| <b>Table S4</b>  | Bond valence analyses for irons in FeFe-cofactor [2] in turnover state (PDB entry: <i>8BOQ</i> ).....                      | 8  |
| <b>Table S5</b>  | Bond valence analyses (abbreviated as Bval) for irons in FeFe-cofactor [1] in resting state (PDB entry: <i>8OIE</i> )..... | 10 |
| <b>Table S6</b>  | Bond valence analyses (abbreviated as Bval) for irons in FeFe-cofactor [2] in resting state (PDB entry: <i>8OIE</i> )..... | 12 |
| <b>Table S7</b>  | Bond valence analyses for irons in P <sup>N</sup> cluster [1] from FeFe-protein (PDB entry: <i>8BOQ</i> ).....             | 14 |
| <b>Table S8</b>  | Bond valence analyses for irons in P <sup>N</sup> cluster [2] from FeFe-protein (PDB entry: <i>8BOQ</i> ).....             | 16 |
| <b>Table S9</b>  | Bond valence analyses for irons in P <sup>N</sup> cluster [1] from FeFe-protein (PDB entry: <i>8OIE</i> ).....             | 18 |
| <b>Table S10</b> | Bond valence analyses for irons in P <sup>N</sup> cluster [2] from FeFe-protein (PDB entry: <i>8OIE</i> ).....             | 20 |
| REFERENCES ..... |                                                                                                                            | 22 |

**Table S1** Bond valence analyses (abbreviated as Bval) for irons in FeFe-cofactor [1] in resting state (PDB entry: *8BOQ*).<sup>1</sup>

| Bond                  | $r_{ij}$ (Å) | $R_0$ (Å) | B (Å) | Bval  | Sum   | Diff.                 | $R_0$ (Å) | B (Å) | Bval  | Sum   | Diff.  |
|-----------------------|--------------|-----------|-------|-------|-------|-----------------------|-----------|-------|-------|-------|--------|
| expected valence = +2 |              |           |       |       |       | expected valence = +3 |           |       |       |       |        |
| Fe1–Scys              | 2.256        | 2.120     | 0.370 | 0.692 |       |                       | 2.149     | 0.370 | 0.749 |       |        |
| Fe1–S1A               | 2.334        | 2.120     | 0.370 | 0.561 |       |                       | 2.149     | 0.370 | 0.607 |       |        |
| Fe1–S2A               | 2.239        | 2.120     | 0.370 | 0.725 |       |                       | 2.149     | 0.370 | 0.784 |       |        |
| Fe1–S4A               | 2.280        | 2.120     | 0.370 | 0.649 | 2.627 | 0.627                 | 2.149     | 0.370 | 0.702 | 2.841 | -0.159 |
| Fe2–C                 | 1.982        | 1.650     | 0.370 | 0.408 |       |                       | 1.689     | 0.370 | 0.453 |       |        |
| Fe2–S1A               | 2.258        | 2.120     | 0.370 | 0.689 |       |                       | 2.149     | 0.370 | 0.745 |       |        |
| Fe2–S2A               | 2.269        | 2.120     | 0.370 | 0.669 |       |                       | 2.149     | 0.370 | 0.723 |       |        |
| Fe2–S2B               | 2.218        | 2.120     | 0.370 | 0.767 | 2.532 | 0.532                 | 2.149     | 0.370 | 0.830 | 2.751 | -0.249 |
| Fe3–C                 | 2.005        | 1.650     | 0.370 | 0.383 |       |                       | 1.689     | 0.370 | 0.426 |       |        |
| Fe3–S2A               | 2.290        | 2.120     | 0.370 | 0.632 |       |                       | 2.149     | 0.370 | 0.683 |       |        |
| Fe3–S4A               | 2.274        | 2.120     | 0.370 | 0.660 |       |                       | 2.149     | 0.370 | 0.713 |       |        |
| Fe3–S5A               | 2.244        | 2.120     | 0.370 | 0.715 | 2.390 | 0.390                 | 2.149     | 0.370 | 0.774 | 2.596 | -0.404 |
| Fe4–C                 | 1.981        | 1.650     | 0.370 | 0.409 |       |                       | 1.689     | 0.370 | 0.454 |       |        |
| Fe4–S1A               | 2.278        | 2.120     | 0.370 | 0.652 |       |                       | 2.149     | 0.370 | 0.661 |       |        |
| Fe4–S3A               | 2.218        | 2.120     | 0.370 | 0.767 |       |                       | 2.149     | 0.370 | 0.830 |       |        |
| Fe4–S4A               | 2.249        | 2.120     | 0.370 | 0.706 | 2.534 | 0.534                 | 2.149     | 0.370 | 0.633 | 2.753 | -0.247 |
| Fe5–C                 | 1.998        | 1.650     | 0.370 | 0.390 |       |                       | 1.689     | 0.370 | 0.434 |       |        |
| Fe5–S1B               | 2.241        | 2.120     | 0.370 | 0.721 |       |                       | 2.149     | 0.370 | 0.780 |       |        |
| Fe5–S3A               | 2.256        | 2.120     | 0.370 | 0.692 |       |                       | 2.149     | 0.370 | 0.749 |       |        |

|         |       |       |       |       |        |       |       |       |       |        |        |
|---------|-------|-------|-------|-------|--------|-------|-------|-------|-------|--------|--------|
| Fe5-S4B | 2.207 | 2.120 | 0.370 | 0.790 | 2.594  | 0.594 | 2.149 | 0.370 | 0.855 | 2.817  | -0.183 |
| Fe6-C   | 2.024 | 1.650 | 0.370 | 0.364 |        |       | 1.689 | 0.370 | 0.404 |        |        |
| Fe6-S1B | 2.226 | 2.120 | 0.370 | 0.751 |        |       | 2.149 | 0.370 | 0.812 |        |        |
| Fe6-S2B | 2.175 | 2.120 | 0.370 | 0.862 |        |       | 2.149 | 0.370 | 0.932 |        |        |
| Fe6-S3B | 2.209 | 2.120 | 0.370 | 0.786 | 2.763  | 0.763 | 2.149 | 0.370 | 0.850 | 2.999  | -0.001 |
| Fe7-C   | 2.039 | 1.650 | 0.370 | 0.349 |        |       | 1.689 | 0.370 | 0.388 |        |        |
| Fe7-S3B | 2.265 | 2.120 | 0.370 | 0.676 |        |       | 2.149 | 0.370 | 0.731 |        |        |
| Fe7-S4B | 2.213 | 2.120 | 0.370 | 0.778 |        |       | 2.149 | 0.370 | 0.841 |        |        |
| Fe7-S5A | 2.272 | 2.120 | 0.370 | 0.663 | 2.466  | 0.466 | 2.149 | 0.370 | 0.717 | 2.678  | -0.322 |
| Fe8-S1B | 2.333 | 2.120 | 0.370 | 0.562 |        |       | 2.149 | 0.370 | 0.608 |        |        |
| Fe8-S3B | 2.358 | 2.120 | 0.370 | 0.526 |        |       | 2.149 | 0.370 | 0.568 |        |        |
| Fe8-S4B | 2.343 | 2.120 | 0.370 | 0.547 |        |       | 2.149 | 0.370 | 0.592 |        |        |
| Fe8-O5  | 2.078 | 1.734 | 0.370 | 0.395 |        |       | 1.759 | 0.370 | 0.422 |        |        |
| Fe8-O7  | 2.090 | 1.734 | 0.370 | 0.382 |        |       | 1.759 | 0.370 | 0.409 |        |        |
| Fe8-N   | 2.204 | 1.769 | 0.370 | 0.309 | 2.721  | 0.721 | 1.815 | 0.370 | 0.349 | 2.949  | -0.051 |
|         |       |       |       |       | 20.627 | 4.627 |       |       |       | 22.384 | -1.616 |

---

**Table S2** Bond valence analyses for irons in FeFe-cofactor [2] in resting state (PDB entry: *8BOQ*).<sup>1</sup>

| Bond                  | $r_{ij}$ (Å) | $R_0$ (Å) | B (Å) | Bval  | Sum   | Diff. | $R_0$ (Å)             | B (Å) | Bval  | Sum   | Diff.  |  |
|-----------------------|--------------|-----------|-------|-------|-------|-------|-----------------------|-------|-------|-------|--------|--|
| expected valence = +2 |              |           |       |       |       |       | expected valence = +3 |       |       |       |        |  |
| Fe1–Scys              | 2.274        | 2.120     | 0.37  | 0.660 |       |       | 2.149                 | 0.37  | 0.713 |       |        |  |
| Fe1–S1A               | 2.308        | 2.120     | 0.37  | 0.602 |       |       | 2.149                 | 0.37  | 0.651 |       |        |  |
| Fe1–S2A               | 2.268        | 2.120     | 0.37  | 0.670 |       |       | 2.149                 | 0.37  | 0.725 |       |        |  |
| Fe1–S4A               | 2.270        | 2.120     | 0.37  | 0.667 | 2.598 | 0.598 | 2.149                 | 0.37  | 0.721 | 2.810 | -0.190 |  |
| Fe2–C                 | 1.994        | 1.650     | 0.37  | 0.395 |       |       | 1.689                 | 0.37  | 0.439 |       |        |  |
| Fe2–S1A               | 2.295        | 2.120     | 0.37  | 0.623 |       |       | 2.149                 | 0.37  | 0.674 |       |        |  |
| Fe2–S2A               | 2.239        | 2.120     | 0.37  | 0.725 |       |       | 2.149                 | 0.37  | 0.784 |       |        |  |
| Fe2–S2B               | 2.211        | 2.120     | 0.37  | 0.782 | 2.525 | 0.525 | 2.149                 | 0.37  | 0.846 | 2.742 | -0.258 |  |
| Fe3–C                 | 2.005        | 1.650     | 0.37  | 0.383 |       |       | 1.689                 | 0.37  | 0.426 |       |        |  |
| Fe3–S2A               | 2.294        | 2.120     | 0.37  | 0.625 |       |       | 2.149                 | 0.37  | 0.676 |       |        |  |
| Fe3–S4A               | 2.247        | 2.120     | 0.37  | 0.709 |       |       | 2.149                 | 0.37  | 0.767 |       |        |  |
| Fe3–S5A               | 2.248        | 2.120     | 0.37  | 0.708 | 2.425 | 0.425 | 2.149                 | 0.37  | 0.765 | 2.634 | -0.366 |  |
| Fe4–C                 | 1.992        | 1.650     | 0.37  | 0.397 |       |       | 1.689                 | 0.37  | 0.441 |       |        |  |
| Fe4–S1A               | 2.278        | 2.120     | 0.37  | 0.652 |       |       | 2.149                 | 0.37  | 0.706 |       |        |  |
| Fe4–S3A               | 2.240        | 2.120     | 0.37  | 0.723 |       |       | 2.149                 | 0.37  | 0.782 |       |        |  |
| Fe4–S4A               | 2.249        | 2.120     | 0.37  | 0.706 | 2.478 | 0.478 | 2.149                 | 0.37  | 0.763 | 2.692 | -0.308 |  |
| Fe5–C                 | 2.025        | 1.650     | 0.37  | 0.363 |       |       | 1.689                 | 0.37  | 0.403 |       |        |  |
| Fe5–S1B               | 2.247        | 2.120     | 0.37  | 0.709 |       |       | 2.149                 | 0.37  | 0.767 |       |        |  |
| Fe5–S3A               | 2.234        | 2.120     | 0.37  | 0.735 |       |       | 2.149                 | 0.37  | 0.795 |       |        |  |

|         |       |       |      |       |        |       |       |      |       |        |        |
|---------|-------|-------|------|-------|--------|-------|-------|------|-------|--------|--------|
| Fe5-S4B | 2.245 | 2.120 | 0.37 | 0.713 | 2.521  | 0.521 | 2.149 | 0.37 | 0.771 | 2.737  | -0.263 |
| Fe6-C   | 2.023 | 1.650 | 0.37 | 0.365 |        |       | 1.689 | 0.37 | 0.405 |        |        |
| Fe6-S1B | 2.248 | 2.120 | 0.37 | 0.708 |        |       | 2.149 | 0.37 | 0.765 |        |        |
| Fe6-S3B | 2.215 | 2.120 | 0.37 | 0.774 |        |       | 2.149 | 0.37 | 0.837 |        |        |
| Fe6-S2B | 2.096 | 1.734 | 0.37 | 0.376 | 2.680  | 0.680 | 1.759 | 0.37 | 0.402 | 2.910  | -0.090 |
| Fe7-C   | 1.996 | 1.650 | 0.37 | 0.393 |        |       | 1.689 | 0.37 | 0.436 |        |        |
| Fe7-S3B | 2.253 | 2.120 | 0.37 | 0.698 |        |       | 2.149 | 0.37 | 0.755 |        |        |
| Fe7-S4B | 2.258 | 2.120 | 0.37 | 0.689 |        |       | 2.149 | 0.37 | 0.745 |        |        |
| Fe7-S5A | 2.237 | 2.120 | 0.37 | 0.729 | 2.508  | 0.508 | 2.149 | 0.37 | 0.788 | 2.724  | -0.276 |
| Fe8-S1B | 2.370 | 2.120 | 0.37 | 0.509 |        |       | 2.149 | 0.37 | 0.550 |        |        |
| Fe8-S3B | 2.381 | 2.120 | 0.37 | 0.494 |        |       | 2.149 | 0.37 | 0.534 |        |        |
| Fe8-S4B | 2.281 | 2.120 | 0.37 | 0.647 |        |       | 2.149 | 0.37 | 0.700 |        |        |
| Fe8-O5  | 2.364 | 1.734 | 0.37 | 0.182 |        |       | 1.759 | 0.37 | 0.195 |        |        |
| Fe8-O7  | 2.175 | 1.734 | 0.37 | 0.304 |        |       | 1.759 | 0.37 | 0.325 |        |        |
| Fe8-N   | 2.241 | 1.769 | 0.37 | 0.279 | 2.415  | 0.415 | 1.815 | 0.37 | 0.316 | 2.620  | -0.380 |
|         |       |       |      |       | 20.150 | 4.150 |       |      |       | 21.869 | -2.131 |

---

**Table S3** Bond valence analyses for irons in FeFe-cofactor [1] in turnover state (PDB entry: *8BOQ*).<sup>1</sup>

| Bond                  | $r_{ij}$ (Å) | $R_0$ (Å) | B (Å) | Bval  | Sum   | Diff.                 | $R_0$ (Å) | B (Å) | Bval  | Sum   | Diff.  |
|-----------------------|--------------|-----------|-------|-------|-------|-----------------------|-----------|-------|-------|-------|--------|
| expected valence = +2 |              |           |       |       |       | expected valence = +3 |           |       |       |       |        |
| Fe1–Scys              | 2.256        | 2.120     | 0.370 | 0.692 |       |                       | 2.149     | 0.370 | 0.749 |       |        |
| Fe1–S1A               | 2.334        | 2.120     | 0.370 | 0.561 |       |                       | 2.149     | 0.370 | 0.607 |       |        |
| Fe1–S2A               | 2.239        | 2.120     | 0.370 | 0.725 |       |                       | 2.149     | 0.370 | 0.784 |       |        |
| Fe1–S4A               | 2.280        | 2.120     | 0.370 | 0.649 | 2.627 | 0.627                 | 2.149     | 0.370 | 0.702 | 2.841 | -0.159 |
| Fe2–C                 | 1.982        | 1.650     | 0.370 | 0.408 |       |                       | 1.689     | 0.370 | 0.453 |       |        |
| Fe2–S1A               | 2.258        | 2.120     | 0.370 | 0.689 |       |                       | 2.149     | 0.370 | 0.745 |       |        |
| Fe2–S2A               | 2.269        | 2.120     | 0.370 | 0.669 |       |                       | 2.149     | 0.370 | 0.723 |       |        |
| Fe2–O                 | 1.967        | 1.734     | 0.37  | 0.533 | 2.298 | 0.298                 | 1.759     | 0.37  | 0.570 | 2.491 | 0.509  |
| Fe3–C                 | 2.005        | 1.650     | 0.370 | 0.383 |       |                       | 1.689     | 0.370 | 0.426 |       |        |
| Fe3–S2A               | 2.290        | 2.120     | 0.370 | 0.632 |       |                       | 2.149     | 0.370 | 0.683 |       |        |
| Fe3–S4A               | 2.274        | 2.120     | 0.370 | 0.660 |       |                       | 2.149     | 0.370 | 0.713 |       |        |
| Fe3–S5A               | 2.244        | 2.120     | 0.370 | 0.715 | 2.390 | 0.390                 | 2.149     | 0.370 | 0.774 | 2.596 | -0.404 |
| Fe4–C                 | 1.981        | 1.650     | 0.370 | 0.409 |       |                       | 1.689     | 0.370 | 0.454 |       |        |
| Fe4–S1A               | 2.278        | 2.120     | 0.370 | 0.652 |       |                       | 2.149     | 0.370 | 0.661 |       |        |
| Fe4–S3A               | 2.218        | 2.120     | 0.370 | 0.767 |       |                       | 2.149     | 0.370 | 0.830 |       |        |
| Fe4–S4A               | 2.249        | 2.120     | 0.370 | 0.706 | 2.534 | 0.534                 | 2.149     | 0.370 | 0.633 | 2.753 | -0.247 |
| Fe5–C                 | 1.998        | 1.650     | 0.370 | 0.390 |       |                       | 1.689     | 0.370 | 0.434 |       |        |
| Fe5–S1B               | 2.241        | 2.120     | 0.370 | 0.721 |       |                       | 2.149     | 0.370 | 0.780 |       |        |
| Fe5–S3A               | 2.256        | 2.120     | 0.370 | 0.692 |       |                       | 2.149     | 0.370 | 0.749 |       |        |
| Fe5–S4B               | 2.207        | 2.120     | 0.370 | 0.790 | 2.594 | 0.594                 | 2.149     | 0.370 | 0.855 | 2.817 | -0.183 |

|         |       |       |       |       |        |       |       |       |       |        |        |
|---------|-------|-------|-------|-------|--------|-------|-------|-------|-------|--------|--------|
| Fe6-C   | 2.024 | 1.650 | 0.370 | 0.364 |        |       | 1.689 | 0.370 | 0.404 |        |        |
| Fe6-S1B | 2.226 | 2.120 | 0.370 | 0.751 |        |       | 2.149 | 0.370 | 0.812 |        |        |
| Fe6-S3B | 2.209 | 2.120 | 0.370 | 0.786 |        |       | 2.149 | 0.370 | 0.850 |        |        |
| Fe6-O   | 1.962 | 1.734 | 0.37  | 0.540 | 2.441  | 0.441 | 1.759 | 0.37  | 0.578 | 2.645  | 0.355  |
| Fe7-C   | 2.039 | 1.650 | 0.370 | 0.349 |        |       | 1.689 | 0.370 | 0.388 |        |        |
| Fe7-S3B | 2.265 | 2.120 | 0.370 | 0.676 |        |       | 2.149 | 0.370 | 0.731 |        |        |
| Fe7-S4B | 2.213 | 2.120 | 0.370 | 0.778 |        |       | 2.149 | 0.370 | 0.841 |        |        |
| Fe7-S5A | 2.272 | 2.120 | 0.370 | 0.663 | 2.466  | 0.466 | 2.149 | 0.370 | 0.717 | 2.678  | -0.322 |
| Fe8-S1B | 2.333 | 2.120 | 0.370 | 0.562 |        |       | 2.149 | 0.370 | 0.608 |        |        |
| Fe8-S3B | 2.358 | 2.120 | 0.370 | 0.526 |        |       | 2.149 | 0.370 | 0.568 |        |        |
| Fe8-S4B | 2.343 | 2.120 | 0.370 | 0.547 |        |       | 2.149 | 0.370 | 0.592 |        |        |
| Fe8-O5  | 2.078 | 1.734 | 0.370 | 0.395 |        |       | 1.759 | 0.370 | 0.422 |        |        |
| Fe8-O7  | 2.090 | 1.734 | 0.370 | 0.382 |        |       | 1.759 | 0.370 | 0.409 |        |        |
| Fe8-N   | 2.204 | 1.769 | 0.370 | 0.309 | 2.721  | 0.721 | 1.815 | 0.370 | 0.349 | 2.949  | -0.051 |
|         |       |       |       |       | 20.070 | 4.070 |       |       |       | 21.769 | -2.231 |

---

**Table S4** Bond valence analyses for irons in FeFe-cofactor [2] in turnover state (PDB entry: *8BOQ*).<sup>1</sup>

| Bond                  | $r_{ij}$ (Å) | $R_0$ (Å) | B (Å) | Bval  | Sum   | Diff.                 | $R_0$ (Å) | B (Å) | Bval  | Sum   | Diff.  |
|-----------------------|--------------|-----------|-------|-------|-------|-----------------------|-----------|-------|-------|-------|--------|
| expected valence = +2 |              |           |       |       |       | expected valence = +3 |           |       |       |       |        |
| Fe1–Scys              | 2.274        | 2.120     | 0.37  | 0.660 |       |                       | 2.149     | 0.37  | 0.713 |       |        |
| Fe1–S1A               | 2.308        | 2.120     | 0.37  | 0.602 |       |                       | 2.149     | 0.37  | 0.651 |       |        |
| Fe1–S2A               | 2.268        | 2.120     | 0.37  | 0.670 |       |                       | 2.149     | 0.37  | 0.725 |       |        |
| Fe1–S4A               | 2.270        | 2.120     | 0.37  | 0.667 | 2.598 | 0.598                 | 2.149     | 0.37  | 0.721 | 2.810 | -0.190 |
| Fe2–C                 | 1.994        | 1.650     | 0.37  | 0.395 |       |                       | 1.689     | 0.37  | 0.439 |       |        |
| Fe2–S1A               | 2.295        | 2.120     | 0.37  | 0.623 |       |                       | 2.149     | 0.37  | 0.674 |       |        |
| Fe2–S2A               | 2.239        | 2.120     | 0.37  | 0.725 |       |                       | 2.149     | 0.37  | 0.784 |       |        |
| Fe2–O                 | 1.815        | 1.734     | 0.37  | 0.803 | 2.546 | 0.546                 | 1.759     | 0.37  | 0.860 | 2.756 | -0.244 |
| Fe3–C                 | 2.005        | 1.650     | 0.37  | 0.383 |       |                       | 1.689     | 0.37  | 0.426 |       |        |
| Fe3–S2A               | 2.294        | 2.120     | 0.37  | 0.625 |       |                       | 2.149     | 0.37  | 0.676 |       |        |
| Fe3–S4A               | 2.247        | 2.120     | 0.37  | 0.709 |       |                       | 2.149     | 0.37  | 0.767 |       |        |
| Fe3–S5A               | 2.248        | 2.120     | 0.37  | 0.708 | 2.425 | 0.425                 | 2.149     | 0.37  | 0.765 | 2.634 | -0.366 |
| Fe4–C                 | 1.992        | 1.650     | 0.37  | 0.397 |       |                       | 1.689     | 0.37  | 0.441 |       |        |
| Fe4–S1A               | 2.278        | 2.120     | 0.37  | 0.652 |       |                       | 2.149     | 0.37  | 0.706 |       |        |
| Fe4–S3A               | 2.240        | 2.120     | 0.37  | 0.723 |       |                       | 2.149     | 0.37  | 0.782 |       |        |
| Fe4–S4A               | 2.249        | 2.120     | 0.37  | 0.706 | 2.478 | 0.478                 | 2.149     | 0.37  | 0.763 | 2.692 | -0.308 |
| Fe5–C                 | 2.025        | 1.650     | 0.37  | 0.363 |       |                       | 1.689     | 0.37  | 0.403 |       |        |
| Fe5–S1B               | 2.247        | 2.120     | 0.37  | 0.709 |       |                       | 2.149     | 0.37  | 0.767 |       |        |



|         |       |       |      |       |        |       |       |      |       |        |        |
|---------|-------|-------|------|-------|--------|-------|-------|------|-------|--------|--------|
| Fe5-S3A | 2.234 | 2.120 | 0.37 | 0.735 |        |       | 2.149 | 0.37 | 0.795 |        |        |
| Fe5-S4B | 2.245 | 2.120 | 0.37 | 0.713 | 2.521  | 0.521 | 2.149 | 0.37 | 0.771 | 2.737  | -0.263 |
| Fe6-C   | 2.023 | 1.650 | 0.37 | 0.365 |        |       | 1.689 | 0.37 | 0.405 |        |        |
| Fe6-S1B | 2.248 | 2.120 | 0.37 | 0.708 |        |       | 2.149 | 0.37 | 0.765 |        |        |
| Fe6-S3B | 2.215 | 2.120 | 0.37 | 0.774 |        |       | 2.149 | 0.37 | 0.837 |        |        |
| Fe6-O   | 2.096 | 1.734 | 0.37 | 0.376 | 2.222  | 0.222 | 1.759 | 0.37 | 0.402 | 2.410  | -0.590 |
| Fe7-C   | 1.996 | 1.650 | 0.37 | 0.393 |        |       | 1.689 | 0.37 | 0.436 |        |        |
| Fe7-S3B | 2.253 | 2.120 | 0.37 | 0.698 |        |       | 2.149 | 0.37 | 0.755 |        |        |
| Fe7-S4B | 2.258 | 2.120 | 0.37 | 0.689 |        |       | 2.149 | 0.37 | 0.745 |        |        |
| Fe7-S5A | 2.237 | 2.120 | 0.37 | 0.729 | 2.508  | 0.508 | 2.149 | 0.37 | 0.788 | 2.724  | -0.276 |
| Fe8-S1B | 2.370 | 2.120 | 0.37 | 0.509 |        |       | 2.149 | 0.37 | 0.550 |        |        |
| Fe8-S3B | 2.381 | 2.120 | 0.37 | 0.494 |        |       | 2.149 | 0.37 | 0.534 |        |        |
| Fe8-S4B | 2.281 | 2.120 | 0.37 | 0.647 |        |       | 2.149 | 0.37 | 0.700 |        |        |
| Fe8-O5  | 2.364 | 1.734 | 0.37 | 0.182 |        |       | 1.759 | 0.37 | 0.195 |        |        |
| Fe8-O7  | 2.175 | 1.734 | 0.37 | 0.304 |        |       | 1.759 | 0.37 | 0.325 |        |        |
| Fe8-N   | 2.241 | 1.769 | 0.37 | 0.279 | 2.415  | 0.415 | 1.815 | 0.37 | 0.316 | 2.620  | -0.380 |
|         |       |       |      |       | 19.713 | 3.713 |       |      |       | 21.383 | -2.617 |

---

**Table S5** Bond valence analyses (abbreviated as Bval) for irons in FeFe-cofactor [1] in resting state (PDB entry: 8OIE).<sup>2</sup>

| Bond                  | $r_{ij}$ (Å) | $R_0$ (Å) | B (Å) | Bval  | Sum   | Diff.                 | $R_0$ (Å) | B (Å) | Bval  | Sum   | Diff.  |
|-----------------------|--------------|-----------|-------|-------|-------|-----------------------|-----------|-------|-------|-------|--------|
| expected valence = +2 |              |           |       |       |       | expected valence = +3 |           |       |       |       |        |
| Fe1–Scys              | 2.254        | 2.120     | 0.370 | 0.696 |       |                       | 2.149     | 0.370 | 0.753 |       |        |
| Fe1–S1A               | 2.268        | 2.120     | 0.370 | 0.610 |       |                       | 2.149     | 0.370 | 0.725 |       |        |
| Fe1–S2A               | 2.280        | 2.120     | 0.370 | 0.670 |       |                       | 2.149     | 0.370 | 0.702 |       |        |
| Fe1–S4A               | 2.303        | 2.120     | 0.370 | 0.649 | 2.625 | 0.625                 | 2.149     | 0.370 | 0.660 | 2.839 | -0.161 |
| Fe2–C                 | 1.986        | 1.650     | 0.370 | 0.376 |       |                       | 1.689     | 0.370 | 0.448 |       |        |
| Fe2–S1A               | 2.265        | 2.120     | 0.370 | 0.713 |       |                       | 2.149     | 0.370 | 0.731 |       |        |
| Fe2–S2A               | 2.248        | 2.120     | 0.370 | 0.834 |       |                       | 2.149     | 0.370 | 0.765 |       |        |
| Fe2–S2B               | 2.221        | 2.120     | 0.370 | 0.692 | 2.616 | 0.616                 | 2.149     | 0.370 | 0.823 | 2.767 | -0.233 |
| Fe3–C                 | 2.003        | 1.650     | 0.370 | 0.403 |       |                       | 1.689     | 0.370 | 0.428 |       |        |
| Fe3–S2A               | 2.280        | 2.120     | 0.370 | 0.676 |       |                       | 2.149     | 0.370 | 0.702 |       |        |
| Fe3–S4A               | 2.280        | 2.120     | 0.370 | 0.708 |       |                       | 2.149     | 0.370 | 0.702 |       |        |
| Fe3–S5A               | 2.234        | 2.120     | 0.370 | 0.761 | 2.548 | 0.548                 | 2.149     | 0.370 | 0.795 | 2.626 | -0.374 |
| Fe4–C                 | 2.012        | 1.650     | 0.370 | 0.385 |       |                       | 1.689     | 0.370 | 0.418 |       |        |
| Fe4–S1A               | 2.245        | 2.120     | 0.370 | 0.649 |       |                       | 2.149     | 0.370 | 0.771 |       |        |
| Fe4–S3A               | 2.187        | 2.120     | 0.370 | 0.649 |       |                       | 2.149     | 0.370 | 0.902 |       |        |
| Fe4–S4A               | 2.256        | 2.120     | 0.370 | 0.735 | 2.418 | 0.418                 | 2.149     | 0.370 | 0.749 | 2.840 | -0.160 |
| Fe5–C                 | 2.003        | 1.650     | 0.370 | 0.390 |       |                       | 1.689     | 0.370 | 0.428 |       |        |
| Fe5–S1B               | 2.214        | 2.120     | 0.370 | 0.700 |       |                       | 2.149     | 0.370 | 0.839 |       |        |
| Fe5–S3A               | 2.167        | 2.120     | 0.370 | 0.708 |       |                       | 2.149     | 0.370 | 0.953 |       |        |
| Fe5–S4B               | 2.219        | 2.120     | 0.370 | 0.700 | 2.498 | 0.498                 | 2.149     | 0.370 | 0.828 | 3.047 | 0.047  |

|         |       |       |       |       |        |       |       |       |       |        |        |
|---------|-------|-------|-------|-------|--------|-------|-------|-------|-------|--------|--------|
| Fe6-C   | 1.975 | 1.650 | 0.370 | 0.385 |        |       | 1.689 | 0.370 | 0.462 |        |        |
| Fe6-S1B | 2.244 | 2.120 | 0.370 | 0.765 |        |       | 2.149 | 0.370 | 0.774 |        |        |
| Fe6-S2B | 2.207 | 2.120 | 0.370 | 0.881 |        |       | 2.149 | 0.370 | 0.855 |        |        |
| Fe6-S3B | 2.207 | 2.120 | 0.370 | 0.776 | 2.807  | 0.807 | 2.149 | 0.370 | 0.855 | 2.945  | -0.055 |
| Fe7-C   | 1.998 | 1.650 | 0.370 | 0.415 |        |       | 1.689 | 0.370 | 0.434 |        |        |
| Fe7-S3B | 2.252 | 2.120 | 0.370 | 0.715 |        |       | 2.149 | 0.370 | 0.757 |        |        |
| Fe7-S4B | 2.252 | 2.120 | 0.370 | 0.790 |        |       | 2.149 | 0.370 | 0.757 |        |        |
| Fe7-S5A | 2.248 | 2.120 | 0.370 | 0.790 | 2.712  | 0.712 | 2.149 | 0.370 | 0.765 | 2.713  | -0.287 |
| Fe8-S1B | 2.272 | 2.120 | 0.370 | 0.607 |        |       | 2.149 | 0.370 | 0.717 |        |        |
| Fe8-S3B | 2.292 | 2.120 | 0.370 | 0.663 |        |       | 2.149 | 0.370 | 0.679 |        |        |
| Fe8-S4B | 2.305 | 2.120 | 0.370 | 0.628 |        |       | 2.149 | 0.370 | 0.656 |        |        |
| Fe8-O5  | 2.208 | 1.734 | 0.370 | 0.278 |        |       | 1.759 | 0.370 | 0.297 |        |        |
| Fe8-O7  | 2.202 | 1.734 | 0.370 | 0.282 |        |       | 1.759 | 0.370 | 0.302 |        |        |
| Fe8-N   | 2.712 | 1.769 | 0.370 | 0.078 | 2.536  | 0.536 | 1.815 | 0.370 | 0.089 | 2.740  | -0.260 |
|         |       |       |       |       | 20.759 | 4.759 |       |       |       | 22.519 | -1.481 |

---

**Table S6** Bond valence analyses (abbreviated as Bval) for irons in FeFe-cofactor [2] in resting state (PDB entry: 8OIE).<sup>2</sup>

| Bond                  | $r_{ij}$ (Å) | $R_0$ (Å) | B (Å) | Bval  | Sum   | Diff.                 | $R_0$ (Å) | B (Å) | Bval  | Sum   | Diff.  |
|-----------------------|--------------|-----------|-------|-------|-------|-----------------------|-----------|-------|-------|-------|--------|
| expected valence = +2 |              |           |       |       |       | expected valence = +3 |           |       |       |       |        |
| Fe1–Scys              | 2.262        | 2.120     | 0.370 | 0.681 |       |                       | 2.149     | 0.370 | 0.737 |       |        |
| Fe1–S1A               | 2.306        | 2.120     | 0.370 | 1.376 |       |                       | 2.149     | 0.370 | 0.654 |       |        |
| Fe1–S2A               | 2.284        | 2.120     | 0.370 | 0.642 |       |                       | 2.149     | 0.370 | 0.694 |       |        |
| Fe1–S4A               | 2.274        | 2.120     | 0.370 | 0.660 | 3.358 | 1.358                 | 2.149     | 0.370 | 0.713 | 2.799 | -0.201 |
| Fe2–C                 | 2.002        | 1.650     | 0.370 | 0.386 |       |                       | 1.689     | 0.370 | 0.429 |       |        |
| Fe2–S1A               | 2.260        | 2.120     | 0.370 | 0.685 |       |                       | 2.149     | 0.370 | 0.741 |       |        |
| Fe2–S2A               | 2.253        | 2.120     | 0.370 | 0.698 |       |                       | 2.149     | 0.370 | 0.755 |       |        |
| Fe2–S2B               | 2.252        | 2.120     | 0.370 | 0.700 | 2.469 | 0.469                 | 2.149     | 0.370 | 0.757 | 2.682 | -0.318 |
| Fe3–C                 | 1.980        | 1.650     | 0.370 | 0.410 |       |                       | 1.689     | 0.370 | 0.455 |       |        |
| Fe3–S2A               | 2.214        | 2.120     | 0.370 | 0.776 |       |                       | 2.149     | 0.370 | 0.839 |       |        |
| Fe3–S4A               | 2.243        | 2.120     | 0.370 | 0.717 |       |                       | 2.149     | 0.370 | 0.776 |       |        |
| Fe3–S5A               | 2.207        | 2.120     | 0.370 | 0.790 | 2.693 | 0.693                 | 2.149     | 0.370 | 0.855 | 2.925 | -0.075 |
| Fe4–C                 | 2.004        | 1.650     | 0.370 | 0.384 |       |                       | 1.689     | 0.370 | 0.427 |       |        |
| Fe4–S1A               | 2.233        | 2.120     | 0.370 | 0.737 |       |                       | 2.149     | 0.370 | 0.797 |       |        |
| Fe4–S3A               | 2.170        | 2.120     | 0.370 | 0.874 |       |                       | 2.149     | 0.370 | 0.945 |       |        |
| Fe4–S4A               | 2.213        | 2.120     | 0.370 | 0.778 | 2.772 | 0.772                 | 2.149     | 0.370 | 0.841 | 3.010 | 0.010  |
| Fe5–C                 | 2.010        | 1.650     | 0.370 | 0.378 |       |                       | 1.689     | 0.370 | 0.420 |       |        |
| Fe5–S1B               | 2.257        | 2.120     | 0.370 | 0.691 |       |                       | 2.149     | 0.370 | 0.747 |       |        |
| Fe5–S3A               | 2.185        | 2.120     | 0.370 | 0.839 |       |                       | 2.149     | 0.370 | 0.907 |       |        |
| Fe5–S4B               | 2.232        | 2.120     | 0.370 | 0.739 | 2.646 | 0.646                 | 2.149     | 0.370 | 0.799 | 2.873 | -0.127 |

|         |       |       |       |       |        |       |       |       |       |        |        |
|---------|-------|-------|-------|-------|--------|-------|-------|-------|-------|--------|--------|
| Fe6-C   | 1.998 | 1.650 | 0.370 | 0.390 |        |       | 1.689 | 0.370 | 0.434 |        |        |
| Fe6-S1B | 2.280 | 2.120 | 0.370 | 0.649 |        |       | 2.149 | 0.370 | 0.702 |        |        |
| Fe6-S2B | 2.235 | 2.120 | 0.370 | 0.733 |        |       | 2.149 | 0.370 | 0.793 |        |        |
| Fe6-S3B | 2.275 | 2.120 | 0.370 | 0.658 | 2.430  | 0.430 | 2.149 | 0.370 | 0.711 | 2.640  | -0.360 |
| Fe7-C   | 1.984 | 1.650 | 0.370 | 0.405 |        |       | 1.689 | 0.370 | 0.451 |        |        |
| Fe7-S3B | 2.248 | 2.120 | 0.370 | 0.708 |        |       | 2.149 | 0.370 | 0.765 |        |        |
| Fe7-S4B | 2.260 | 2.120 | 0.370 | 0.685 |        |       | 2.149 | 0.370 | 0.741 |        |        |
| Fe7-S5A | 2.216 | 2.120 | 0.370 | 0.771 | 2.569  | 0.569 | 2.149 | 0.370 | 0.834 | 2.791  | -0.209 |
| Fe8-S1B | 2.303 | 2.120 | 0.370 | 0.610 |        |       | 2.149 | 0.370 | 0.660 |        |        |
| Fe8-S3B | 2.288 | 2.120 | 0.370 | 0.635 |        |       | 2.149 | 0.370 | 0.687 |        |        |
| Fe8-S4B | 2.269 | 2.120 | 0.370 | 0.669 |        |       | 2.149 | 0.370 | 0.723 |        |        |
| Fe8-O5  | 2.214 | 1.734 | 0.370 | 0.273 |        |       | 1.759 | 0.370 | 0.292 |        |        |
| Fe8-O7  | 2.203 | 1.734 | 0.370 | 0.282 |        |       | 1.759 | 0.370 | 0.301 |        |        |
| Fe8-N   | 2.709 | 1.769 | 0.370 | 0.079 | 2.547  | 0.547 | 1.815 | 0.370 | 0.089 | 2.752  | -0.248 |
|         |       |       |       |       | 21.486 | 5.486 |       |       |       | 22.471 | -1.529 |

---

**Table S7** Bond valence analyses for irons in P<sup>N</sup> cluster [1] from FeFe-protein (PDB entry: *8BOQ*).<sup>1</sup>

| Bond                  | $r_{ij}$ (Å) | $R_0$ (Å) | B (Å) | Bval  | Sum   | Diff.                 | $R_0$ (Å) | B (Å) | Bval  | Sum   | Diff.  |
|-----------------------|--------------|-----------|-------|-------|-------|-----------------------|-----------|-------|-------|-------|--------|
| expected valence = +2 |              |           |       |       |       | expected valence = +3 |           |       |       |       |        |
| Fe1-S1                | 2.395        | 2.120     | 0.370 | 0.476 |       |                       | 2.149     | 0.370 | 0.514 |       |        |
| Fe1-S2A               | 2.311        | 2.120     | 0.370 | 0.597 |       |                       | 2.149     | 0.370 | 0.645 |       |        |
| Fe1-S3A               | 2.328        | 2.120     | 0.370 | 0.570 |       |                       | 2.149     | 0.370 | 0.616 |       |        |
| Fe1-SG                | 2.287        | 2.120     | 0.370 | 0.637 | 2.279 | 0.279                 | 2.149     | 0.370 | 0.689 | 2.465 | -0.535 |
| Fe2-S1                | 2.461        | 2.120     | 0.370 | 0.398 |       |                       | 2.149     | 0.370 | 0.430 |       |        |
| Fe2-S2A               | 2.291        | 2.120     | 0.370 | 0.630 |       |                       | 2.149     | 0.370 | 0.681 |       |        |
| Fe2-S4A               | 2.346        | 2.120     | 0.370 | 0.543 |       |                       | 2.149     | 0.370 | 0.587 |       |        |
| Fe2-SG                | 2.364        | 2.120     | 0.370 | 0.517 | 2.088 | 0.088                 | 2.149     | 0.370 | 0.559 | 2.258 | -0.742 |
| Fe3-S2A               | 2.294        | 2.120     | 0.370 | 0.625 |       |                       | 2.149     | 0.370 | 0.676 |       |        |
| Fe3-S3A               | 2.310        | 2.120     | 0.370 | 0.598 |       |                       | 2.149     | 0.370 | 0.647 |       |        |
| Fe3-S4A               | 2.236        | 2.120     | 0.370 | 0.731 |       |                       | 2.149     | 0.370 | 0.790 |       |        |
| Fe3-SG                | 2.263        | 2.120     | 0.370 | 0.679 | 2.634 | 0.634                 | 2.149     | 0.370 | 0.735 | 2.848 | -0.152 |
| Fe4-S1                | 2.463        | 2.120     | 0.370 | 0.396 |       |                       | 2.149     | 0.370 | 0.428 |       |        |
| Fe4-S3A               | 2.295        | 2.120     | 0.370 | 0.623 |       |                       | 2.149     | 0.370 | 0.674 |       |        |
| Fe4-S4A               | 2.258        | 2.120     | 0.370 | 0.689 |       |                       | 2.149     | 0.370 | 0.745 |       |        |
| Fe4-SG                | 2.229        | 2.120     | 0.370 | 0.745 | 2.452 | 0.452                 | 2.149     | 0.370 | 0.806 | 2.652 | -0.348 |
| Fe5-S1                | 2.476        | 2.120     | 0.370 | 0.382 |       |                       | 2.149     | 0.370 | 0.413 |       |        |
| Fe5-S2B               | 2.367        | 2.120     | 0.370 | 0.513 |       |                       | 2.149     | 0.370 | 0.555 |       |        |
| Fe5-S4B               | 2.279        | 2.120     | 0.370 | 0.651 |       |                       | 2.149     | 0.370 | 0.704 |       |        |
| Fe5-SG                | 2.309        | 2.120     | 0.370 | 0.600 | 2.146 | 0.146                 | 2.149     | 0.370 | 0.649 | 2.321 | -0.679 |
| Fe6-S1                | 2.554        | 2.120     | 0.370 | 0.309 |       |                       | 2.149     | 0.370 | 0.335 |       |        |
| Fe6-S2B               | 2.461        | 2.120     | 0.370 | 0.398 |       |                       | 2.149     | 0.370 | 0.430 |       |        |
| Fe6-S3B               | 2.299        | 2.120     | 0.370 | 0.616 |       |                       | 2.149     | 0.370 | 0.667 |       |        |

|         |       |       |       |       |        |        |       |       |       |        |        |
|---------|-------|-------|-------|-------|--------|--------|-------|-------|-------|--------|--------|
| Fe6-SG  | 2.342 | 2.120 | 0.370 | 0.549 | 1.873  | -0.127 | 2.149 | 0.370 | 0.594 | 2.025  | -0.975 |
| Fe7-S2B | 2.354 | 2.120 | 0.370 | 0.531 |        |        | 2.149 | 0.370 | 0.575 |        |        |
| Fe7-S3B | 2.277 | 2.120 | 0.370 | 0.654 |        |        | 2.149 | 0.370 | 0.708 |        |        |
| Fe7-S4B | 2.251 | 2.120 | 0.370 | 0.702 |        |        | 2.149 | 0.370 | 0.759 |        |        |
| Fe7-SG  | 2.357 | 2.120 | 0.370 | 0.527 | 2.414  | 0.414  | 2.149 | 0.370 | 0.570 | 2.611  | -0.389 |
| Fe8-S1  | 2.361 | 2.120 | 0.370 | 0.521 |        |        | 2.149 | 0.370 | 0.564 |        |        |
| Fe8-S3B | 2.259 | 2.120 | 0.370 | 0.687 |        |        | 2.149 | 0.370 | 0.743 |        |        |
| Fe8-S4B | 2.294 | 2.120 | 0.370 | 0.625 |        |        | 2.149 | 0.370 | 0.676 |        |        |
| Fe8-SG  | 2.293 | 2.120 | 0.370 | 0.627 | 2.460  | 0.460  | 2.149 | 0.370 | 0.678 | 2.660  | -0.340 |
|         |       |       |       |       | 18.345 | 2.345  |       |       |       | 19.841 | -4.159 |

---

**Table S8** Bond valence analyses for irons in P<sup>N</sup> cluster [2] from FeFe-protein (PDB entry: *8BOQ*).<sup>1</sup>

| Bond                  | $r_{ij}$ (Å) | $R_0$ (Å) | B (Å) | Bval  | Sum   | Diff.                 | $R_0$ (Å) | B (Å) | Bval  | Sum   | Diff.  |
|-----------------------|--------------|-----------|-------|-------|-------|-----------------------|-----------|-------|-------|-------|--------|
| expected valence = +2 |              |           |       |       |       | expected valence = +3 |           |       |       |       |        |
| Fe1-S1                | 2.429        | 2.120     | 0.370 | 0.434 |       |                       | 2.149     | 0.370 | 0.469 |       |        |
| Fe1-S2A               | 2.292        | 2.120     | 0.370 | 0.628 |       |                       | 2.149     | 0.370 | 0.679 |       |        |
| Fe1-S3A               | 2.307        | 2.120     | 0.370 | 0.603 |       |                       | 2.149     | 0.370 | 0.652 |       |        |
| Fe1-SG                | 2.457        | 2.120     | 0.370 | 0.402 | 2.067 | 0.067                 | 2.149     | 0.370 | 0.435 | 2.236 | -0.764 |
| Fe2-S1                | 2.456        | 2.120     | 0.370 | 0.403 |       |                       | 2.149     | 0.370 | 0.436 |       |        |
| Fe2-S2A               | 2.307        | 2.120     | 0.370 | 0.603 |       |                       | 2.149     | 0.370 | 0.652 |       |        |
| Fe2-S4A               | 2.327        | 2.120     | 0.370 | 0.572 |       |                       | 2.149     | 0.370 | 0.618 |       |        |
| Fe2-SG                | 2.291        | 2.120     | 0.370 | 0.630 | 2.208 | 0.208                 | 2.149     | 0.370 | 0.681 | 2.388 | -0.612 |
| Fe3-S2A               | 2.305        | 2.120     | 0.370 | 0.607 |       |                       | 2.149     | 0.370 | 0.656 |       |        |
| Fe3-S3A               | 2.365        | 2.120     | 0.370 | 0.516 |       |                       | 2.149     | 0.370 | 0.558 |       |        |
| Fe3-S4A               | 2.228        | 2.120     | 0.370 | 0.747 |       |                       | 2.149     | 0.370 | 0.808 |       |        |
| Fe3-SG                | 2.273        | 2.120     | 0.370 | 0.661 | 2.530 | 0.530                 | 2.149     | 0.370 | 0.715 | 2.737 | -0.263 |
| Fe4-S1                | 2.421        | 2.120     | 0.370 | 0.443 |       |                       | 2.149     | 0.370 | 0.479 |       |        |
| Fe4-S3A               | 2.303        | 2.120     | 0.370 | 0.610 |       |                       | 2.149     | 0.370 | 0.660 |       |        |
| Fe4-S4A               | 2.317        | 2.120     | 0.370 | 0.587 |       |                       | 2.149     | 0.370 | 0.635 |       |        |
| Fe4-SG                | 2.250        | 2.120     | 0.370 | 0.704 | 2.344 | 0.344                 | 2.149     | 0.370 | 0.761 | 2.535 | -0.465 |
| Fe5-S1                | 2.507        | 2.120     | 0.370 | 0.351 |       |                       | 2.149     | 0.370 | 0.380 |       |        |
| Fe5-S2B               | 2.371        | 2.120     | 0.370 | 0.507 |       |                       | 2.149     | 0.370 | 0.549 |       |        |
| Fe5-S4B               | 2.266        | 2.120     | 0.370 | 0.674 |       |                       | 2.149     | 0.370 | 0.729 |       |        |
| Fe5-SG                | 2.231        | 2.120     | 0.370 | 0.741 | 2.274 | 0.274                 | 2.149     | 0.370 | 0.801 | 2.459 | -0.541 |
| Fe6-S1                | 2.588        | 2.120     | 0.370 | 0.282 |       |                       | 2.149     | 0.370 | 0.305 |       |        |
| Fe6-S2B               | 2.491        | 2.120     | 0.370 | 0.367 |       |                       | 2.149     | 0.370 | 0.397 |       |        |



|         |       |       |       |       |        |        |       |       |       |        |        |
|---------|-------|-------|-------|-------|--------|--------|-------|-------|-------|--------|--------|
| Fe6-S3B | 2.253 | 2.120 | 0.370 | 0.698 |        |        | 2.149 | 0.370 | 0.755 |        |        |
| Fe6-SG  | 2.352 | 2.120 | 0.370 | 0.534 | 1.881  | -0.119 | 2.149 | 0.370 | 0.578 | 2.035  | -0.965 |
| Fe7-S2B | 2.320 | 2.120 | 0.370 | 0.582 |        |        | 2.149 | 0.370 | 0.630 |        |        |
| Fe7-S3B | 2.324 | 2.120 | 0.370 | 0.576 |        |        | 2.149 | 0.370 | 0.623 |        |        |
| Fe7-S4B | 2.247 | 2.120 | 0.370 | 0.709 |        |        | 2.149 | 0.370 | 0.767 |        |        |
| Fe7-SG  | 2.333 | 2.120 | 0.370 | 0.562 | 2.430  | 0.430  | 2.149 | 0.370 | 0.608 | 2.629  | -0.371 |
| Fe8-S1  | 2.363 | 2.120 | 0.370 | 0.519 |        |        | 2.149 | 0.370 | 0.561 |        |        |
| Fe8-S3B | 2.250 | 2.120 | 0.370 | 0.704 |        |        | 2.149 | 0.370 | 0.761 |        |        |
| Fe8-S4B | 2.278 | 2.120 | 0.370 | 0.652 |        |        | 2.149 | 0.370 | 0.706 |        |        |
| Fe8-SG  | 2.275 | 2.120 | 0.370 | 0.658 | 2.532  | 0.532  | 2.149 | 0.370 | 0.711 | 2.739  | -0.261 |
|         |       |       |       |       | 18.354 | 2.354  |       |       |       | 19.850 | -4.150 |

**Table S9** Bond valence analyses for irons in P<sup>N</sup> cluster [1] from FeFe-protein (PDB entry: 8OIE).<sup>2</sup>

| Bond                  | $r_{ij}$ (Å) | $R_0$ (Å) | B (Å) | Bval  | Sum   | Diff.                 | $R_0$ (Å) | B (Å) | Bval  | Sum   | Diff.  |
|-----------------------|--------------|-----------|-------|-------|-------|-----------------------|-----------|-------|-------|-------|--------|
| expected valence = +2 |              |           |       |       |       | expected valence = +3 |           |       |       |       |        |
| Fe1-S1                | 2.497        | 2.120     | 0.370 | 0.361 |       |                       | 2.149     | 0.370 | 0.390 |       |        |
| Fe1-S2A               | 2.316        | 2.120     | 0.370 | 0.589 |       |                       | 2.149     | 0.370 | 0.637 |       |        |
| Fe1-S3A               | 2.359        | 2.120     | 0.370 | 0.524 |       |                       | 2.149     | 0.370 | 0.567 |       |        |
| Fe1-SG                | 2.241        | 2.120     | 0.370 | 0.721 | 2.195 | 0.195                 | 2.149     | 0.370 | 0.780 | 2.374 | -0.626 |
| Fe2-S1                | 2.428        | 2.120     | 0.370 | 0.435 |       |                       | 2.149     | 0.370 | 0.470 |       |        |
| Fe2-S2A               | 2.312        | 2.120     | 0.370 | 0.595 |       |                       | 2.149     | 0.370 | 0.644 |       |        |
| Fe2-S4A               | 2.251        | 2.120     | 0.370 | 0.702 |       |                       | 2.149     | 0.370 | 0.759 |       |        |
| Fe2-SG                | 2.330        | 2.120     | 0.370 | 0.567 | 2.299 | 0.299                 | 2.149     | 0.370 | 0.613 | 2.486 | -0.514 |
| Fe3-S2A               | 2.366        | 2.120     | 0.370 | 0.514 |       |                       | 2.149     | 0.370 | 0.556 |       |        |
| Fe3-S3A               | 2.341        | 2.120     | 0.370 | 0.550 |       |                       | 2.149     | 0.370 | 0.595 |       |        |
| Fe3-S4A               | 2.373        | 2.120     | 0.370 | 0.505 |       |                       | 2.149     | 0.370 | 0.546 |       |        |
| Fe3-SG                | 2.299        | 2.120     | 0.370 | 0.616 | 2.186 | 0.186                 | 2.149     | 0.370 | 0.667 | 2.364 | -0.636 |
| Fe4-S1                | 2.480        | 2.120     | 0.370 | 0.378 |       |                       | 2.149     | 0.370 | 0.409 |       |        |
| Fe4-S3A               | 2.370        | 2.120     | 0.370 | 0.509 |       |                       | 2.149     | 0.370 | 0.550 |       |        |
| Fe4-S4A               | 2.222        | 2.120     | 0.370 | 0.759 |       |                       | 2.149     | 0.370 | 0.821 |       |        |
| Fe4-SG                | 2.248        | 2.120     | 0.370 | 0.708 | 2.353 | 0.353                 | 2.149     | 0.370 | 0.765 | 2.545 | -0.455 |
| Fe5-S1                | 2.479        | 2.120     | 0.370 | 0.379 |       |                       | 2.149     | 0.370 | 0.410 |       |        |
| Fe5-S2B               | 2.290        | 2.120     | 0.370 | 0.632 |       |                       | 2.149     | 0.370 | 0.683 |       |        |
| Fe5-S4B               | 2.266        | 2.120     | 0.370 | 0.674 |       |                       | 2.149     | 0.370 | 0.729 |       |        |
| Fe5-SG                | 2.251        | 2.120     | 0.370 | 0.702 | 2.386 | 0.386                 | 2.149     | 0.370 | 0.759 | 2.581 | -0.419 |
| Fe6-S1                | 2.405        | 2.120     | 0.370 | 0.463 |       |                       | 2.149     | 0.370 | 0.501 |       |        |
| Fe6-S2B               | 2.315        | 2.120     | 0.370 | 0.590 |       |                       | 2.149     | 0.370 | 0.638 |       |        |
| Fe6-S3B               | 2.266        | 2.120     | 0.370 | 0.670 |       |                       | 2.149     | 0.370 | 0.729 |       |        |

|         |       |       |       |       |        |       |       |       |       |        |        |
|---------|-------|-------|-------|-------|--------|-------|-------|-------|-------|--------|--------|
| Fe6-SG  | 2.268 | 2.120 | 0.370 | 0.670 | 2.394  | 0.394 | 2.149 | 0.370 | 0.725 | 2.593  | -0.407 |
| Fe7-S2B | 2.319 | 2.120 | 0.370 | 0.584 |        |       | 2.149 | 0.370 | 0.632 |        |        |
| Fe7-S3B | 2.375 | 2.120 | 0.370 | 0.502 |        |       | 2.149 | 0.370 | 0.543 |        |        |
| Fe7-S4B | 2.282 | 2.120 | 0.370 | 0.645 |        |       | 2.149 | 0.370 | 0.698 |        |        |
| Fe7-SG  | 2.238 | 2.120 | 0.370 | 0.727 | 2.458  | 0.458 | 2.149 | 0.370 | 0.786 | 2.659  | -0.341 |
| Fe8-S1  | 2.393 | 2.120 | 0.370 | 0.478 |        |       | 2.149 | 0.370 | 0.517 |        |        |
| Fe8-S3B | 2.231 | 2.120 | 0.370 | 0.741 |        |       | 2.149 | 0.370 | 0.801 |        |        |
| Fe8-S4B | 2.267 | 2.120 | 0.370 | 0.672 |        |       | 2.149 | 0.370 | 0.727 |        |        |
| Fe8-SG  | 2.280 | 2.120 | 0.370 | 0.649 | 2.540  | 0.540 | 2.149 | 0.370 | 0.702 | 2.747  | -0.253 |
|         |       |       |       |       | 18.812 | 2.812 |       |       |       | 20.349 | -3.651 |

---

**Table S10** Bond valence analyses for irons in P<sup>N</sup> cluster [2] from FeFe-protein (PDB entry: *8OIE*).<sup>2</sup>

| Bond                  | $r_{ij}$ (Å) | $R_0$ (Å) | B (Å) | Bval  | Sum   | Diff.                 | $R_0$ (Å) | B (Å) | Bval  | Sum   | Diff.  |
|-----------------------|--------------|-----------|-------|-------|-------|-----------------------|-----------|-------|-------|-------|--------|
| expected valence = +2 |              |           |       |       |       | expected valence = +3 |           |       |       |       |        |
| Fe1-S1                | 2.399        | 2.120     | 0.370 | 0.470 |       |                       | 2.149     | 0.370 | 0.509 |       |        |
| Fe1-S2A               | 2.317        | 2.120     | 0.370 | 0.587 |       |                       | 2.149     | 0.370 | 0.635 |       |        |
| Fe1-S3A               | 2.273        | 2.120     | 0.370 | 0.661 |       |                       | 2.149     | 0.370 | 0.715 |       |        |
| Fe1-SG                | 2.399        | 2.120     | 0.370 | 0.470 | 2.189 | 0.189                 | 2.149     | 0.370 | 0.509 | 2.368 | -0.632 |
| Fe2-S1                | 2.490        | 2.120     | 0.370 | 0.368 |       |                       | 2.149     | 0.370 | 0.398 |       |        |
| Fe2-S2A               | 2.294        | 2.120     | 0.370 | 0.625 |       |                       | 2.149     | 0.370 | 0.676 |       |        |
| Fe2-S4A               | 2.270        | 2.120     | 0.370 | 0.667 |       |                       | 2.149     | 0.370 | 0.721 |       |        |
| Fe2-SG                | 2.329        | 2.120     | 0.370 | 0.568 | 2.228 | 0.228                 | 2.149     | 0.370 | 0.615 | 2.409 | -0.591 |
| Fe3-S2A               | 2.328        | 2.120     | 0.370 | 0.570 |       |                       | 2.149     | 0.370 | 0.616 |       |        |
| Fe3-S3A               | 2.386        | 2.120     | 0.370 | 0.487 |       |                       | 2.149     | 0.370 | 0.527 |       |        |
| Fe3-S4A               | 2.287        | 2.120     | 0.370 | 0.637 |       |                       | 2.149     | 0.370 | 0.689 |       |        |
| Fe3-SG                | 2.311        | 2.120     | 0.370 | 0.597 | 2.291 | 0.291                 | 2.149     | 0.370 | 0.645 | 2.478 | -0.522 |
| Fe4-S1                | 2.389        | 2.120     | 0.370 | 0.483 |       |                       | 2.149     | 0.370 | 0.523 |       |        |
| Fe4-S3A               | 2.225        | 2.120     | 0.370 | 0.753 |       |                       | 2.149     | 0.370 | 0.814 |       |        |
| Fe4-S4A               | 2.266        | 2.120     | 0.370 | 0.674 |       |                       | 2.149     | 0.370 | 0.729 |       |        |
| Fe4-SG                | 2.249        | 2.120     | 0.370 | 0.706 | 2.616 | 0.616                 | 2.149     | 0.370 | 0.763 | 2.829 | -0.171 |
| Fe5-S1                | 2.420        | 2.120     | 0.370 | 0.444 |       |                       | 2.149     | 0.370 | 0.481 |       |        |
| Fe5-S2B               | 2.309        | 2.120     | 0.370 | 0.600 |       |                       | 2.149     | 0.370 | 0.649 |       |        |
| Fe5-S4B               | 2.244        | 2.120     | 0.370 | 0.715 |       |                       | 2.149     | 0.370 | 0.774 |       |        |
| Fe5-SG                | 2.257        | 2.120     | 0.370 | 0.691 | 2.450 | 0.450                 | 2.149     | 0.370 | 0.747 | 2.650 | -0.350 |
| Fe6-S1                | 2.507        | 2.120     | 0.370 | 0.674 |       |                       | 2.149     | 0.370 | 0.380 |       |        |
| Fe6-S2B               | 2.319        | 2.120     | 0.370 | 0.584 |       |                       | 2.149     | 0.370 | 0.632 |       |        |
| Fe6-S3B               | 2.351        | 2.120     | 0.370 | 0.536 |       |                       | 2.149     | 0.370 | 0.579 |       |        |

|         |       |       |       |       |        |       |       |       |       |        |        |
|---------|-------|-------|-------|-------|--------|-------|-------|-------|-------|--------|--------|
| Fe6-SG  | 2.266 | 2.120 | 0.370 | 0.674 | 2.468  | 0.468 | 2.149 | 0.370 | 0.729 | 2.320  | -0.680 |
| Fe7-S2B | 2.357 | 2.120 | 0.370 | 0.527 |        |       | 2.149 | 0.370 | 0.570 |        |        |
| Fe7-S3B | 2.331 | 2.120 | 0.370 | 0.565 |        |       | 2.149 | 0.370 | 0.611 |        |        |
| Fe7-S4B | 2.368 | 2.120 | 0.370 | 0.512 |        |       | 2.149 | 0.370 | 0.553 |        |        |
| Fe7-SG  | 2.230 | 2.120 | 0.370 | 0.743 | 2.347  | 0.347 | 2.149 | 0.370 | 0.803 | 2.538  | -0.462 |
| Fe8-S1  | 2.484 | 2.120 | 0.370 | 0.374 |        |       | 2.149 | 0.370 | 0.404 |        |        |
| Fe8-S3B | 2.377 | 2.120 | 0.370 | 0.499 |        |       | 2.149 | 0.370 | 0.540 |        |        |
| Fe8-S4B | 2.223 | 2.120 | 0.370 | 0.757 |        |       | 2.149 | 0.370 | 0.819 |        |        |
| Fe8-SG  | 2.282 | 2.120 | 0.370 | 0.645 | 2.276  | 0.276 | 2.149 | 0.370 | 0.698 | 2.461  | -0.539 |
|         |       |       |       |       | 18.864 | 2.864 |       |       |       | 20.053 | -3.947 |

---

## REFERENCES

1. C. Trncik, F. Detemple and O. Einsle, *Nat. Catal.*, 2023, **6**, 415–424.
2. F. V. Schmidt, L. Schulz, J. Zarzycki, S. Prinz, N. N. Oehlmann, T. J. Erb and J. G. Rebelein, *Nat. Struct. Mol. Biol.*, 2023, DOI: 10.1038/s41594-023-01124-2.
